# Supplementary material for: One dimensional graphene nanoscroll-wrapped MnO nanoparticles for high-performance lithium ion hybrid capacitors
Source: Royal Society of Chemistry journal article supplement (doi:10.1039/d1ta00404b), 2021-01-01
Supplement: d1ta00404b1.pdf [file d1ta00404b1.pdf]

## ***Supplementary Information***

### One Dimensional Graphene Nanoscroll-Wrapped MnO Nanoparticles for High-Performance Lithium Ion Hybrid Capacitors

Bingjun Yang,<sup>ac</sup> Jiangtao Chen,<sup>a</sup> Bao Liu,<sup>ac</sup> Yunxia Ding,<sup>a</sup> Yu Tang,<sup>b\*</sup>  
and Xingbin Yan<sup>acd\*</sup>

<sup>a</sup>Laboratory of Clean Energy Chemistry and Materials, State Key Laboratory of Solid Lubrication, Lanzhou Institute of Chemical Physics, Chinese Academy of Sciences, Lanzhou 730000, China

<sup>b</sup>State Key Laboratory of Applied Organic Chemistry, Key Laboratory of Nonferrous Metal Chemistry and Resources Utilization of Gansu Province, College of Chemistry and Chemical Engineering, Lanzhou University, Lanzhou 730000, China

<sup>c</sup>Center of Materials Science and Optoelectronics Engineering, University of Chinese Academy of Sciences, Beijing 100049, China

<sup>d</sup>Dalian National Laboratory for Clean Energy, Dalian 116023, China

\*Corresponding authors Xingbin Yan, Yu Tang

E-mail: [xbyan@licp.cas.cn](mailto:xbyan@licp.cas.cn), [tangyu@lzu.edu.cn](mailto:tangyu@lzu.edu.cn)

Keywords: graphene nanoscroll, MnO, anode, 3D framework activated carbon, lithium-ion hybrid capacitors.

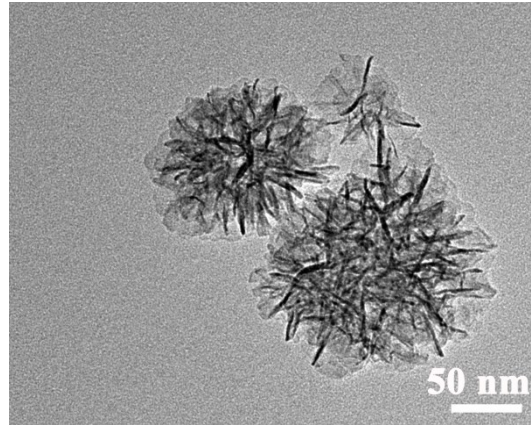

**Figure S1.** High magnification TEM image of spherical  $K_xMnO_2$  precursors.

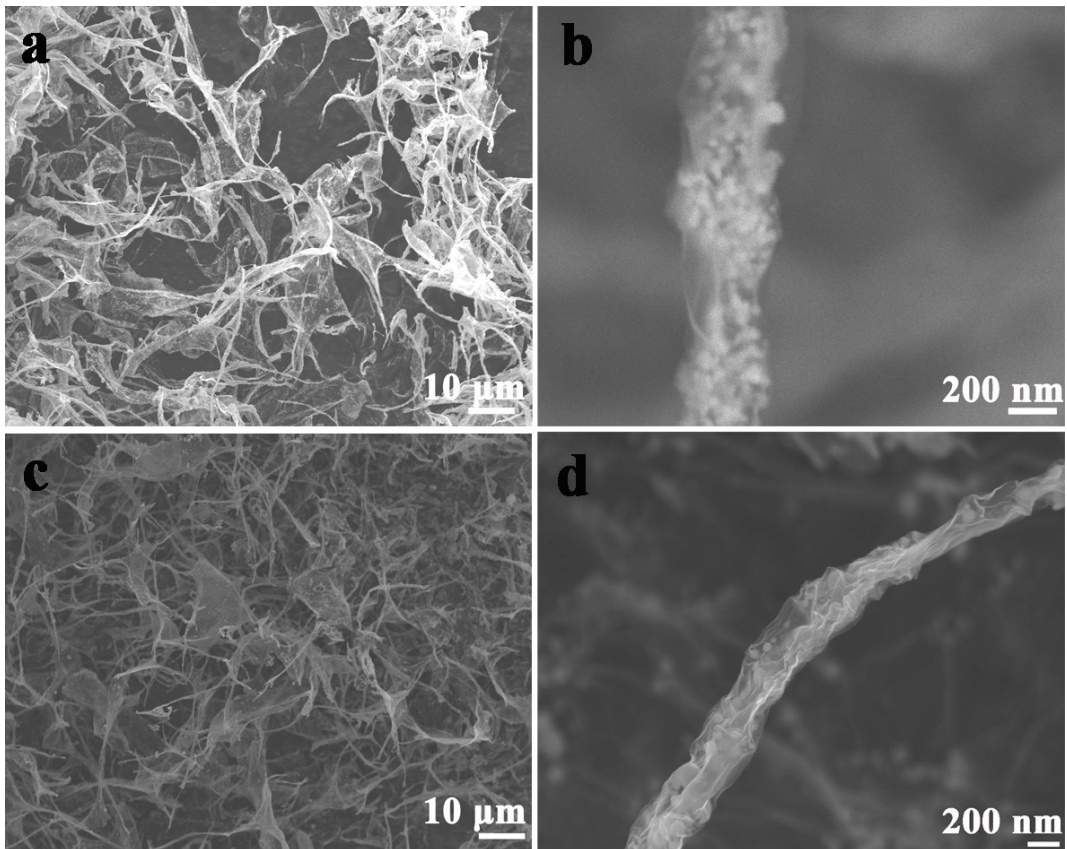

**Figure S2.** High and low magnification SEM images of GNS@MnO with different  
Calcination temperature: (a,b) GNS@MnO<sub>x</sub>-400, (c,d) GNS@MnO-800.

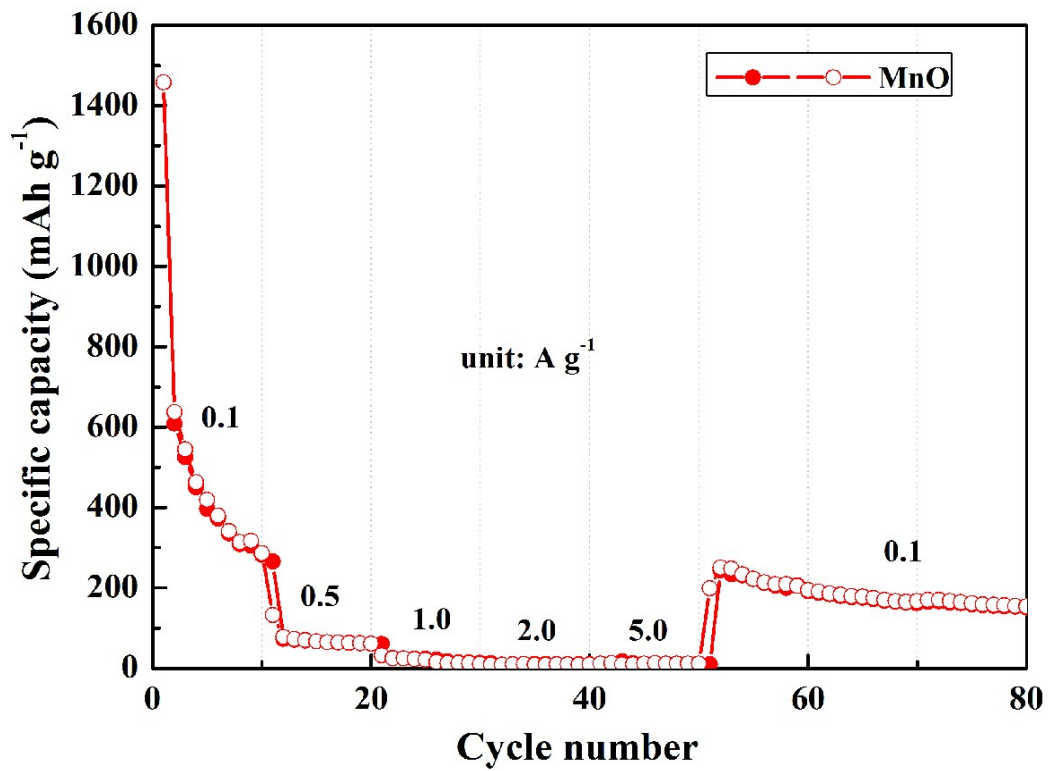

Figure S3. Rate performance of pure MnO electrode.

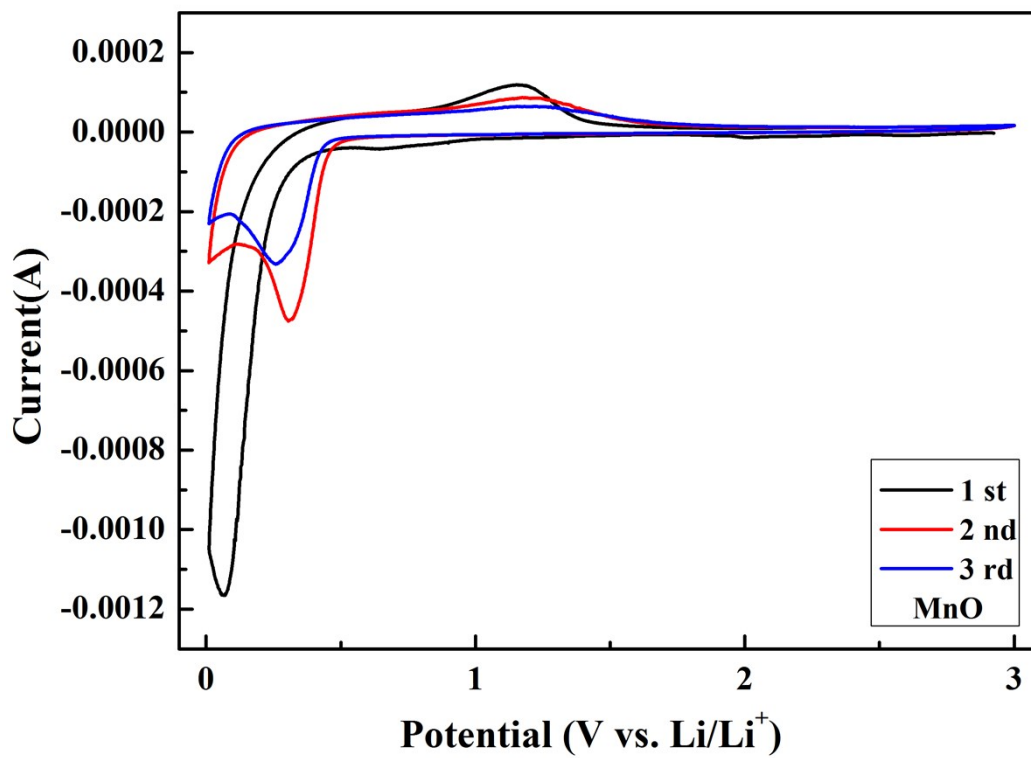

Figure S4. The first three CV curves of MnO at a scan rate of 0.1 mV s<sup>-1</sup>.

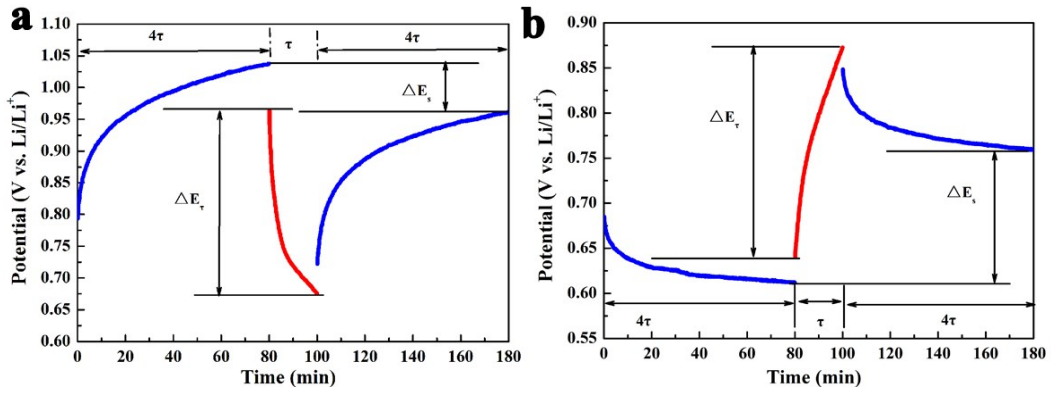

**Figure S5.** Scheme for voltage response with time during a single constant current pulse: (a) Discharge. (b) Charge.

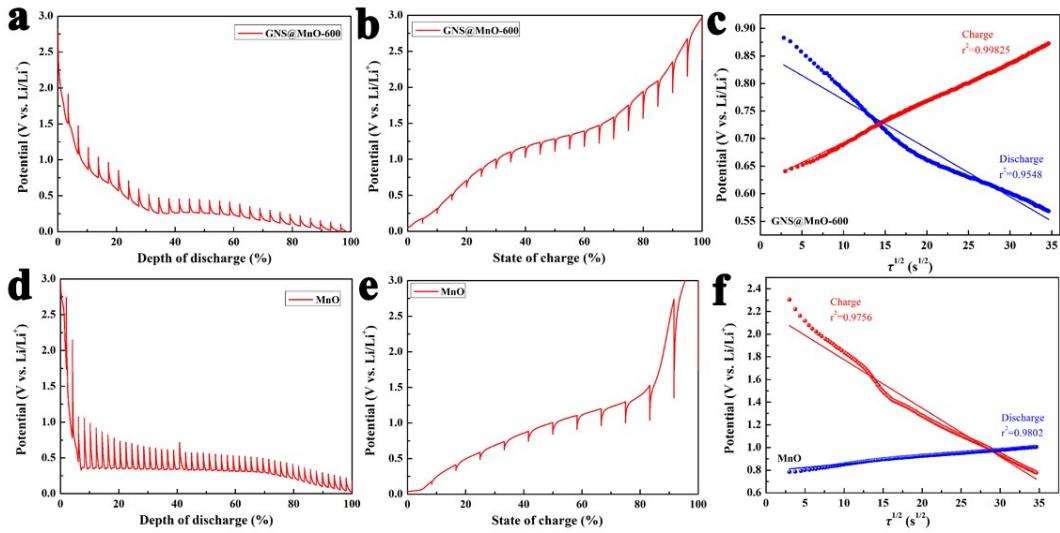

**Figure S6.** GITT characterization: GITT potential profiles of (a) discharge and (b) charge for GNS@MnO-600 anode. (c) Variation of cell potential during single charge and discharge titration plotted against  $\tau^{1/2}$  for GNS@MnO-600 anode. GITT potential profiles of (d) discharge and (e) charge for MnO anode. (f) Variation of cell potential during single charge and discharge titration plotted against  $\tau^{1/2}$  for pure MnO anode.

GITT is an effective strategy to estimate the apparent  $\text{Li}^+$  ion diffusion coefficient at different quasi-equilibrium potentials. During the test, a relatively small titration current density (i.e.,  $0.1 \text{ A g}^{-1}$ ) is applied for a relatively short period (i.e.,  $\tau = 20 \text{ min}$

= 1200 s) to induce a potential shift ( $\Delta E\tau$ ), followed by much longer relaxation period (i.e.,  $4\tau = 80 \text{ min} = 4800 \text{ s}$ ) to reach a quasi-equilibrium potential for the calculation of  $\Delta E_s$  (Figure S5). The above titration-relaxation cycle is performed continuously at the whole potential window (i.e., 0.01-3.0 V vs. Li/Li<sup>+</sup>) to give a completed potential profile (Figure S6).

The apparent Li<sup>+</sup> diffusion coefficient ( $D$ , cm<sup>2</sup> s<sup>-1</sup>) is calculated based on Fick's second law of diffusion (equation S1):<sup>1,2</sup>

$$D = \frac{4}{\pi} \left( \frac{mV_m}{MA} \right)^2 \left( \frac{\Delta E_s/\tau}{dE_\tau/d\sqrt{\tau}} \right)^2 \quad (\text{S1})$$

where  $m$ (g) is mass loading,  $V_m$  (cm<sup>3</sup> mol<sup>-1</sup>) is molar volume of the electrode,  $M$  (g mol<sup>-1</sup>) is molar weight of the electrode,  $A$  (cm<sup>2</sup>) is electroactive area of the electrode,  $\Delta E_s$  (V) is the change of quasi-equilibrium potential after two sequential relaxation period,  $\tau$  (s) is charge or discharge time during each titration,  $dE_\tau/d\sqrt{\tau}$  (V s<sup>-1/2</sup>) is potential shift rate.

The above equation S1 can be simplified as equation S2 by applying the small current density for a sufficiently short time in each titration.

$$D = \frac{4}{\pi\tau} \left( \frac{mV_m}{MA} \right)^2 \left( \frac{\Delta E_s}{\Delta E_\tau} \right)^2 \quad (\text{S2})$$

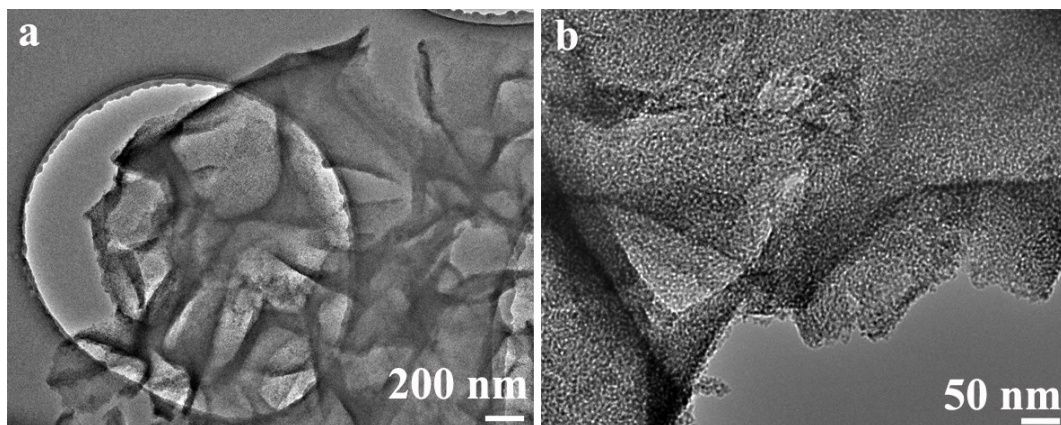

**Figure S7.** TEM images of 3DFAC

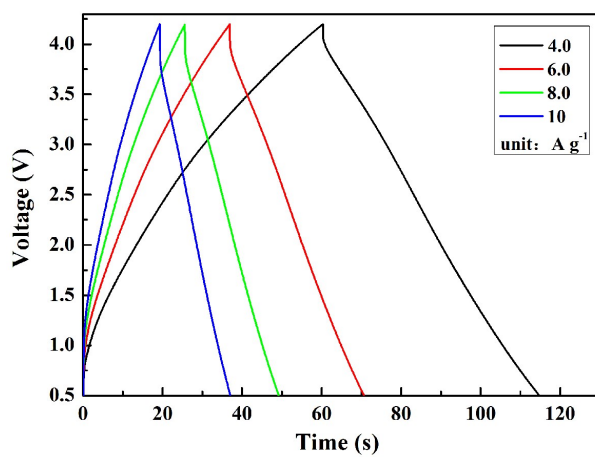

**Figure S8.** GCD profiles of GNS@MnO-600//3DFAC LIHC (1:1) at high current density.

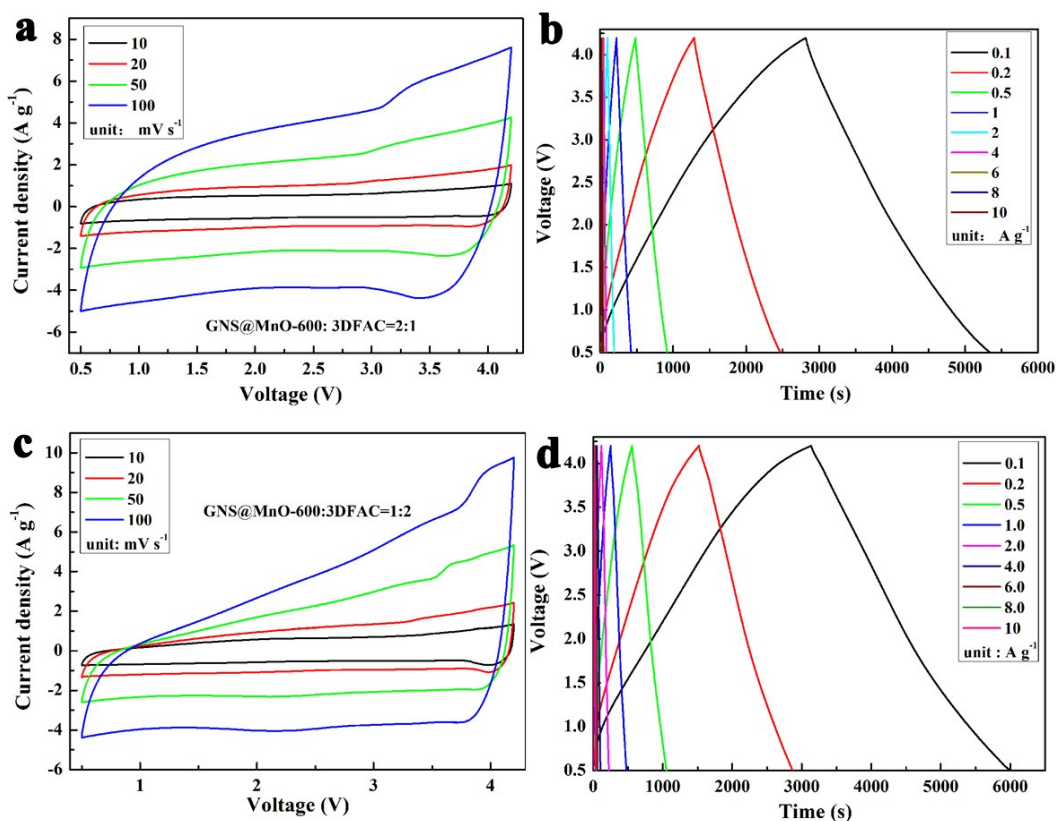

**Figure S9.** CVs and GCD profiles of GNS@MnO-600//3DFAC LIHCs with different mass ratios: (a, b) 2:1; (c, d) 1:2.

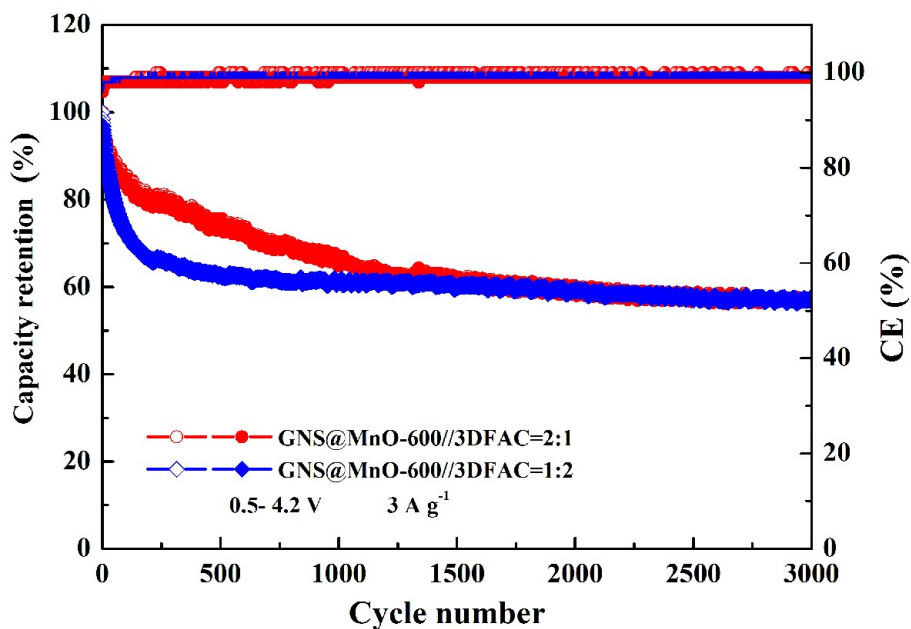

**Figure S10.** Cycling stability of the as-assembled GNS@MnO-600//3DFAC devices with mass ratios of 2:1 and 1:2.

Table S1. Comparison of the electrochemical performances of the as-prepared 1D GNS@MnO-600 anode with other MnO-C anode materials for LIBs reported previously.

| Materials             | Rate performance                                                                                               | Ref.             |
|-----------------------|----------------------------------------------------------------------------------------------------------------|------------------|
| MnO@NC/ graphite      | 0.1 A g <sup>-1</sup> / 835 mA h g <sup>-1</sup><br>5.0 A g <sup>-1</sup> / 387 mA h g <sup>-1</sup>           | 3                |
| NC/MnO/RGO            | 0.1 A g <sup>-1</sup> / 925.9 mA h g <sup>-1</sup><br>5.0 A g <sup>-1</sup> / 355.5 mA h g <sup>-1</sup>       | 4                |
| MnO@HCF-2             | 0.1 A g <sup>-1</sup> / 586.8 mA h g <sup>-1</sup><br>4.0 A g <sup>-1</sup> / 327.8 mA h g <sup>-1</sup>       | 5                |
| MnO@N-CS              | 0.2 A g <sup>-1</sup> / 917mA h g <sup>-1</sup><br>5.0 A g <sup>-1</sup> / 328 mA h g <sup>-1</sup>            | 6                |
| MnO/Mn3O4/N-graphene  | 0.5 A g <sup>-1</sup> / 681 mA h g <sup>-1</sup><br>2.0 A g <sup>-1</sup> / 365 mA h g <sup>-1</sup>           | 7                |
| MnO/N-PCNTs           | 0.1 A g <sup>-1</sup> / 652 mA h g <sup>-1</sup><br>1.0 A g <sup>-1</sup> / 220 mA h g <sup>-1</sup>           | 8                |
| MnO/Metal/Carbon      | 0.1 C / 600 mA h g <sup>-1</sup><br>5.0 C / 200 mA h g <sup>-1</sup>                                           | 9                |
| Sn-MnO@CYINs          | 0.2 A g <sup>-1</sup> / 662 mA h g <sup>-1</sup><br>2.0 A g <sup>-1</sup> / 402 mA h g <sup>-1</sup>           | 10               |
| RGO-MnO@NC            | 0.5 A g <sup>-1</sup> / 599 mA h g <sup>-1</sup><br>5.0 A g <sup>-1</sup> / 331 mA h g <sup>-1</sup>           | 11               |
| C/MnO/SiOC            | 0.1 A g <sup>-1</sup> / 684 mA h g <sup>-1</sup><br>2.0 A g <sup>-1</sup> / 408 mA h g <sup>-1</sup>           | 12               |
| MnO-PS                | 0.1 A g <sup>-1</sup> / 960 mA h g <sup>-1</sup><br>2.0 A g <sup>-1</sup> / 300 mA h g <sup>-1</sup>           | 13               |
| <b>1D GNS@MnO-600</b> | <b>0.1 A g<sup>-1</sup> / 766 mA h g<sup>-1</sup></b><br><b>5.0 A g<sup>-1</sup> / 437 mA h g<sup>-1</sup></b> | <b>This work</b> |

## References

- 1 W. Weppner and R. A. Huggins, *J. Electrochem. Soc.*, 1977, **124**, 1569-1578.
- 2 H. Li, J. Chen, L. Zhang, K. Wang, X. Zhang, B. Yang, L. Liu, W. Liu and X. Yan, *J. Mater. Chem. A*, 2020, **8**, 16302-16311.



- 3 Y. Xue, H. Li, M. Zhang, W. Yu, K. Zhuo and G. Bai, *J. Alloys Compd.*, 2020, **848**, 156571.
- 4 G. Li, Z. Li, Z. Hou, Y. Liu and S. Jiao, *Electrochim. Acta*, 2020, **363**, 137184.
- 5 Z.-Y. Chen, B. He, D. Yan, X.-F. Yu and W.-C. Li, *J. Power Sources*, 2020, **472**, 228501.
- 6 S. Huang, H. Li, G. Xu, X. Liu, Q. Zhang, L. Yang, J. Cao and X. Wei, *Electrochim. Acta*, 2020, **342**, 136115.
- 7 C. Zhou, K. Zhang, M. Hong, Y. Yang, N. Hu, Y. Su, L. Zhang and Y. Zhang, *Chemical Engineering Journal*, 2020, **385**, 123720.
- 8 P. Mu, W. Ma, Y. Zhao, C. Zhang, S. Ren, F. Wang, C. Yan, Y. Chen, J. H. Zeng and J.-X. Jiang, *J. Power Sources*, 2019, **426**, 33-39.
- 9 X. Wang, L. Ma, Q. Ji, J.-Q. Meng, S. Liang, Z. Xu, M. Wang, X. Zuo, Y. Xiao, J. Zhu, Y. Xia, P. Müller-Buschbaum and Y.-J. Cheng, *Adv. Mater. Interfaces*, 2019, **6**, 1900335.
- 10 F. Zhang, Y. Wang, W. Guo, S. Rao and P. Mao, *Chemical Engineering Journal*, 2019, **360**, 1509-1516.
- 11 Y. Wang, H. Wu, Z. Liu, H. Zhao, H. Liu and Y. Zhang, *Inorg. Chem.*, 2018, **57**, 13693-13701.
- 12 H. Huang, C. Shi, R. Fang, Y. Xia, C. Liang, Y. Gan, J. Zhang, X. Tao and W. Zhang, *Chemical Engineering Journal*, 2019, **359**, 584-593.
- 13 P. Remith and N. Kalaiselvi, *Phys. Chem. Chem. Phys.*, 2016, **18**, 15854-15860.
